# Supplementary material
Source: PubMed Central journal article supplement (PMC2931596)
Supplement: NIHMS223473-supplement-1_si_001.pdf [file NIHMS223473-supplement-1_si_001.pdf]

**A combinatorial approach to determine functional group effects on lipidoid-mediated  
siRNA delivery**

Kerry P. Mahon<sup>†</sup>, Kevin T. Love<sup>†</sup>, Kathryn A. Whitehead<sup>†</sup>, June Qin<sup>‡</sup>, Akin Akinc<sup>‡</sup>, Elizaveta  
Leshchiner<sup>†</sup>, Ignaty Leshchiner<sup>†</sup>, Robert Langer<sup>†</sup>, Daniel G. Anderson<sup>\*†</sup>

<sup>†</sup>Department of Chemical Engineering and David H. Koch Institute of Integrative Cancer  
Research, Massachusetts Institute of Technology, 77 Massachusetts Ave., Cambridge, MA,  
02139. <sup>‡</sup>Alnylam Pharmaceuticals, Inc., 300 Third Street, Cambridge, MA 02142

## Supporting Information

### Scheme 1 Synthesis of amine modified core lipidoids

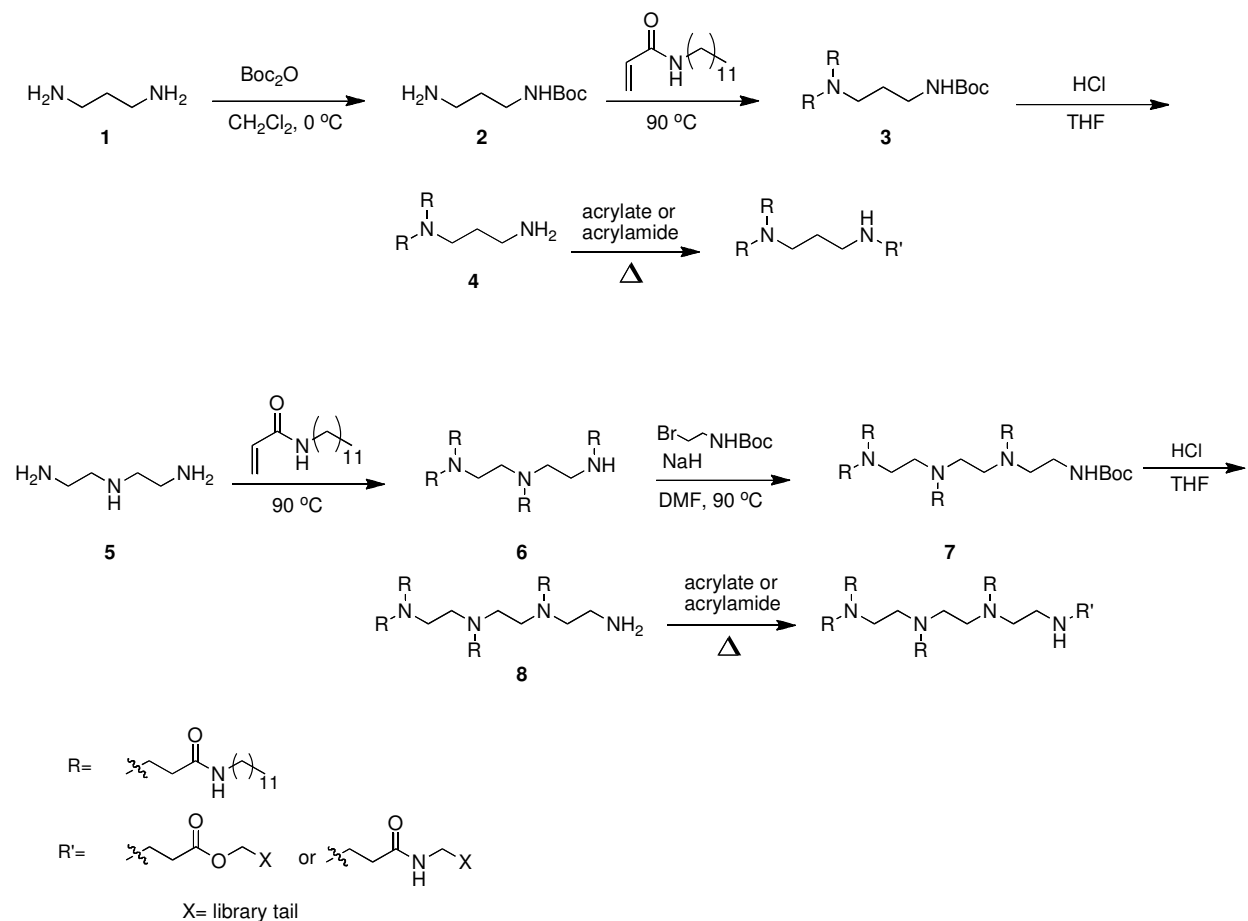

#### Synthesis of 2

15g of **1** (1,3-diaminopropane, 74.12g/mol, 243mmol, 1.0 eq.) was added to 150ml of  $\text{CH}_2\text{Cl}_2$  and the solution was cooled in an ice bath to  $4^\circ\text{C}$ . In a separate vessel, 3.9g Di-*tert*-butyl dicarbonate (218.25g/mol, 24.3mmol, 0.1 eq.) was dissolved in 20ml  $\text{CH}_2\text{Cl}_2$  and added to the amine solution dropwise over one hour. The reaction was allowed to gradually warm to room temperature while stirring overnight. After extraction 5 times with 20ml  $\text{H}_2\text{O}$ , the organic layer

was dried with  $\text{MgSO}_4$  and concentrated to an oil. 2.6g (83%). MW calc. ( $\text{C}_8\text{H}_{18}\text{N}_2\text{O}_2$ )= 174.13 found 171.15.

$^1\text{H}$  NMR (300 MHz,  $\text{CDCl}_3$ ,  $\delta$ ): 4.95 (s, 1H, *NH*), 3.25-3.13 (m, 2H, *NCH}\_2*), 2.80-2.73 (m, 2H, *NCH}\_2*), 1.55-1.55 (m, 2H,  $\text{CH}_2\text{CH}_2\text{CH}_2$ ), 1.45 (s,  $\text{CH}_3(\text{OCH}_3)_3$ ).

### *Synthesis of 3*

Added 6.05g dodecylacrylamide (239.4g/mol, 19.0mmol, 2.2 eq.) and 2.0g **2** (174.14g/mol, 8.6mmol, 1.0 eq.) to a 20ml scintillation vial equipped with a stirbar. Loosely capped the vial and placed at  $90^\circ\text{C}$  for 5 days. Purified using silica gel chromatography with a solvent gradient of 5-30% Ultra (75:22:3  $\text{CH}_2\text{Cl}_2$ : MeOH:  $\text{NH}_4\text{OH}$ ) in  $\text{CH}_2\text{Cl}_2$  over 120 min. 2.5g (33%).

MW calc. ( $\text{C}_{38}\text{H}_{76}\text{N}_4\text{O}_4$ )= 652.58 found 652.57

$^1\text{H}$  NMR (300 MHz,  $\text{CDCl}_3$ ,  $\delta$ ):

6.95–6.85 (m, 2H, *NH*), 4.6 (s, 1H, *NH*), 3.25–3.1 (m, 6H, *NCH}\_2*), 2.70–2.60 (m, 4H, *NCH}\_2*), 2.36-2.31 (m, 2H, *NCH}\_2*), 2.29-2.25 (m, 4H,  $\text{C}(\text{O})\text{CH}_2$ ), 1.71 (s, 2H,  $\text{NCH}_2\text{CH}_2\text{CH}_2\text{N}$ ), 1.57-1.50 (m, 4H,  $\text{NHCH}_2\text{CH}_2\text{CH}_2$ ), 1.47 (s, 9H,  $\text{C}(\text{O})\text{O}(\text{CH}_3)_3$ ), 1.26-1.23 (m, 36H,  $\text{CH}_2\text{CH}_2\text{CH}_2$ ), 0.93-0.85 (m, 6H,  $\text{CH}_3$ ).

### *Synthesis of 4*

Dissolved 2.5g **3** (653.03g/mol, 8.1mmol, 1.0 eq.) in 3ml THF. In a separate vessel, added 3.2g 37% HCl (36.46g/mol, 81mmol, 10 eq.) to 1ml THF. Added the HCl solution dropwise to the solution of **2** over 5 min. Stirred rapidly overnight at room temperature. Diluted the reaction mixture in 75ml  $\text{CH}_2\text{Cl}_2$  and extracted 2x 50 ml  $\text{H}_2\text{O}$ , 1x 50ml brine. Dried the  $\text{CH}_2\text{Cl}_2$  solution

with  $\text{MgSO}_4$  and concentrated under vacuum. Purified using silica gel chromatography with a solvent gradient of 20-50% Ultra in  $\text{CH}_2\text{Cl}_2$  over 80 min. 1.6g (76%)

MW calc. ( $\text{C}_{33}\text{H}_{68}\text{N}_4\text{O}_2$ ) = 552.53 found 552.54

$^1\text{H}$  NMR (300 MHz,  $\text{CDCl}_3$ ,  $\delta$ ): 6.80-6.75 (m, 2H, NH), 3.24-3.13 (m, 4H,  $\text{NCH}_2$ ), 2.73-2.67 (m, 6H,  $\text{NCH}_2$ ), 2.51-2.45 (m, 2H,  $\text{NCH}_2$ ), 2.35-2.29 (m, 4H,  $\text{C}(\text{O})\text{CH}_2$ ), 1.65-1.52 (m, 2H,  $\text{NCH}_2\text{CH}_2\text{CH}_2\text{NH}_2$ ), 1.51-1.40 (m, 4H,  $\text{NHCH}_2\text{CH}_2\text{CH}_2$ ), 1.36-1.19 (m, 36H,  $\text{CH}_2\text{CH}_2\text{CH}_2$ ), 0.92-0.83 (m, 6H,  $\text{CH}_3$ ).

#### *Conjugation to library*

Added 120mg **4** (0.21mmol, 1.0 eq.) to a 2ml vial equipped with stir bar. Added 0.24 mmol, 1.1 eq. of the appropriate acrylate/ acrylamide. Placed in a  $90^\circ\text{C}$  oven for 18 hrs. (acrylates) or 3 days (acrylamides).

#### *Synthesis of 6*

Added 515mg **5** (diethylenetriamine, 103.17g/mol, 5.0 mmol, 1.0 eq) and 5.0g dodecylacrylamide (239.4g/mol, 20.9mmol, 4.2eq.) to a 20ml scintillation vial equipped with a stirbar. Set up in duplicate. Loosely capped the vial and placed in an oven at  $90^\circ\text{C}$  for 6 days. After cooling, dissolved the material in both vials in 5ml  $\text{CH}_2\text{Cl}_2$ . And purified using silica gel chromatography with a solvent gradient of 10-40% Ultra in  $\text{CH}_2\text{Cl}_2$  over 40 min. Left with 2.26g (21%) of the desired product.

MW calc. ( $\text{C}_{64}\text{H}_{129}\text{N}_7\text{O}_4$ ) = 1060.01 found 1060.02

$^1\text{H}$  NMR (300 MHz,  $\text{CDCl}_3$ ,  $\delta$ ): 7.40–7.35 (m, 1H, NH), 7.15-7.10 (m, 1H, NH), 6.75-6.70 (m, 1H, NH), 3.25-3.1 (m, 8H,  $\text{C}(\text{O})\text{CH}_2$ ), 2.90-2.25 (m, 24H,  $\text{NHCH}_2$ ,  $\text{NCH}_2$ ), 1.55-1.40 (m, 8H,  $\text{NHCH}_2\text{CH}_2$ ), 1.40-1.17 (m, 72H,  $\text{CH}_2\text{CH}_2\text{CH}_2$ ), 0.93-0.86 (m, 12H,  $\text{CH}_3$ ).

### *Synthesis of 7*

Added 2.2g **6** (1060.1g/mol, 2.1mmol, 1.0 eq) and 1.63g N(Boc)-bromoethylamine (224 g/mol, 7.3mmol, 3.5eq) to a 20ml scintillation vial. Added 3ml DMF and stirbar. Added 292mg NaH.(60% dispersion, 24g/mol, 7.3mmol, 3.5 eq). Loosely capped the vial and placed in a  $90^\circ\text{C}$  oven for 2.5 days. Diluted the reaction with 10ml  $\text{CHCl}_3$  and filtered to remove the solids in the reaction. Further diluted with 100ml  $\text{CHCl}_3$  and washed 2x 50ml  $\text{H}_2\text{O}$  and 1x50ml brine.

Combine aqueous layers and extract with 50 ml  $\text{CHCl}_3$ . Combined the organic layers, dried the solution with  $\text{MgSO}_4$  and concentrated under vacuum. Purified using silica gel chromatography with a solvent gradient of 10-40% Ultra in  $\text{CH}_2\text{Cl}_2$  over 60 min. 1.47g (59%).

MW calc.( $\text{C}_{71}\text{H}_{142}\text{N}_8\text{O}_6$ )= 1203.10 found 1203.08

$^1\text{H}$  NMR (300 MHz,  $\text{CDCl}_3$ ,  $\delta$ ): 7.40-7.35 (m, 1H, NH), 7.20-7.05 (m, 2H, NH), 5.25-5.20 (m, 1H, NH), 3.27-3.10 (m, 8H,  $\text{C}(\text{O})\text{CH}_2$ ), 2.80-2.25 (m, 28 H,  $\text{NCH}_2\text{CH}_2\text{N}$ ,  $\text{NCH}_2\text{CH}_2\text{C}(\text{O})$ ,  $\text{NHCH}_2$ ), 1.55-1.40 (m, 17H,  $\text{NHCH}_2\text{CH}_2$ ,  $\text{C}(\text{O})\text{O}(\text{CH}_3)_3$ ), 1.37-1.20 (m, 72H,  $\text{CH}_2\text{CH}_2\text{CH}_2$ ), 0.95-0.85 (m, 12H,  $\text{CH}_3$ ).

### *Synthesis of 8*

Dissolved 1.47g **7** (1203.94g/mol, 1.22mmol, 1.0 eq.) in 2ml THF. In a separate vessel, added 1.2g 37% HCl (36.46g/mol, 12.2mmol, 10 eq.) to 1ml THF. Added the HCl solution dropwise to the solution of **7** over 5 min. Stirred rapidly overnight at room temperature. Brought to pH 10

using  $\text{NH}_4\text{OH}$ . Diluted the reaction mixture in 100ml  $\text{CH}_2\text{Cl}_2$  and extracted 3x 30 ml  $\text{H}_2\text{O}$ , 1x 50ml brine. Combined the aqueous washes and extracted with 60ml  $\text{CH}_2\text{Cl}_2$ . Combined the  $\text{CH}_2\text{Cl}_2$  solutions, dried the  $\text{CH}_2\text{Cl}_2$  solution with  $\text{MgSO}_4$ , filtered and concentrated under vacuum. Purified using silica gel chromatography with a solvent gradient of 10-35% Ultra in  $\text{CH}_2\text{Cl}_2$  over 40 min. 710mg (53%).

MW calc. ( $\text{C}_{66}\text{H}_{134}\text{N}_8\text{O}_4$ ) = 1103.05 found 1103.04

$^1\text{H}$  NMR (300 MHz,  $\text{CDCl}_3$ ,  $\delta$ ): 7.60-7.55 (m, 1H, NH), 7.40-7.35 (m, 1H, NH), 7.25-7.17 (m, 2H, NH), 3.25-3.10 (m, 8H,  $\text{NHCH}_2$ ), 2.80-2.60 (m, 10H,  $\text{NCH}_2$ ), 2.55-2.40 (m, 10H,  $\text{NCH}_2$ ), 2.38-2.25 (m, 8H,  $\text{C}(\text{O})\text{CH}_2$ ), 1.55-1.45 (m, 8H,  $\text{NHCH}_2\text{CH}_2$ ), 1.39-1.20 (m, 72H,  $\text{CH}_2\text{CH}_2\text{CH}_2$ ), 0.92-0.83 (m, 12H,  $\text{CH}_3$ )

#### Conjugation to library

Added 120mg **8** (0.1 mmol, 1.0 eq.) to a 2ml vial equipped with stir bar. Added 0.12 mmol, 1.1 eq. of the appropriate acrylate/ acrylamide. Placed in a  $90^\circ\text{C}$  oven for 18 hrs. (acrylates) or 3 days (acrylamides).

| Compound | Library Tail                                                                        | MALDI Analysis                                                                      |
|----------|-------------------------------------------------------------------------------------|-------------------------------------------------------------------------------------|
| 1a       | 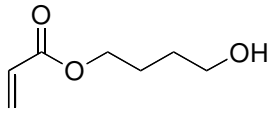 | Calc. ( $\text{C}_{73}\text{H}_{146}\text{N}_8\text{O}_7$ ): 1247.99 Found: 1248.02 |
| 2a       |  | Calc. ( $\text{C}_{76}\text{H}_{151}\text{N}_9\text{O}_8$ ): 1319.07 Found: 1319.12 |
| 6a       |  | Calc. ( $\text{C}_{81}\text{H}_{162}\text{N}_8\text{O}_8$ ): 1376.2 Found: 1376.44  |

|     |  |                                                                                                  |
|-----|--|--------------------------------------------------------------------------------------------------|
| 10a |  | Calc.(C <sub>90</sub> H <sub>180</sub> N <sub>8</sub> O <sub>13</sub> ): 1582.44 Found<br>1584.2 |
| 11a |  | Calc.(C <sub>81</sub> H <sub>162</sub> N <sub>8</sub> O <sub>9</sub> ): 1392.2 Found<br>1391.96  |
| 15a |  | Calc.(C <sub>78</sub> H <sub>157</sub> N <sub>9</sub> O <sub>5</sub> ): 1301.14 Found<br>1301.54 |
| 2b  |  | Calc.(C <sub>43</sub> H <sub>85</sub> N <sub>5</sub> O <sub>6</sub> ): 768.16 Found:<br>768.53   |
| 3b  |  | Calc.(C <sub>41</sub> H <sub>83</sub> N <sub>5</sub> O <sub>4</sub> ): 710.55 Found:<br>710.13   |
| 4b  |  | Calc.(C <sub>42</sub> H <sub>84</sub> N <sub>4</sub> O <sub>6</sub> ): 741.14 Found:<br>741.85   |
| 6b  |  | Calc.(C <sub>48</sub> H <sub>96</sub> N <sub>4</sub> O <sub>6</sub> ): 825.30 Found<br>825.65    |
| 12b |  | Calc.(C <sub>45</sub> H <sub>90</sub> N <sub>4</sub> O <sub>4</sub> ): 751.22 Found:<br>751.61   |
| 13b |  | Calc.(C <sub>48</sub> H <sub>96</sub> N <sub>4</sub> O <sub>4</sub> ): 792.74 Found<br>792.75    |
| 15b |  | Calc.(C <sub>45</sub> H <sub>91</sub> N <sub>5</sub> O <sub>3</sub> ): 750.24 Found:<br>750.64   |

Table S1 Formulation parameters for library testing *in vivo*

| Compound | Formulation Parameters |             |     |                   | Characterization |                              |
|----------|------------------------|-------------|-----|-------------------|------------------|------------------------------|
|          | Lipidoid               | Cholesterol | PEG | Total Lipid:siRNA | Size (nm)        | Entrapment (% siRNA content) |
| 1a       | 42                     | 48          | 10  | 8                 | 103.5            | 82                           |
| 2a       | 42                     | 48          | 10  | 8                 | 48.2             | 95                           |
| 6a       | 42                     | 48          | 10  | 8                 | 55.6             | 96                           |
| 10a      | 42                     | 48          | 10  | 8                 | 114.1            | 61                           |
| 11a      | 42                     | 48          | 10  | 8                 | 45.0             | 95                           |
| 15a      | 42                     | 48          | 10  | 8                 | 62.1             | 95                           |
| 2b       | 42                     | 48          | 10  | 15                | 98.7             | 97                           |
| 3b       | 42                     | 48          | 10  | 15                | 138.5            | 98                           |
| 4b       | 42                     | 48          | 10  | 15                | 109.6            | 86                           |
| 6b       | 42                     | 48          | 10  | 15                | 55.4             | 92                           |
| 12b      | 42                     | 48          | 10  | 15                | 85.1             | 94                           |
| 13b      | 42                     | 48          | 10  | 15                | 92.3             | 91                           |
| 15b      | 42                     | 48          | 10  | 15                | 65.1             | 96                           |

Table S2 Formulation parameters for *in vivo* dose response

| Compound | Formulation Parameters |             |     |                   | Characterization |                              |
|----------|------------------------|-------------|-----|-------------------|------------------|------------------------------|
|          | Lipidoid               | Cholesterol | PEG | Total Lipid:siRNA | Size (nm)        | Entrapment (% siRNA content) |
| 6a 15:1  | 42                     | 48          | 10  | 15                | 111.6            | 95                           |
| 10a 12:1 | 42                     | 48          | 10  | 12                | 99.9             | 96                           |
| 6a 15:1  | 42                     | 48          | 10  | 15                | 167.7            | 95                           |
| 10a12:1  | 42                     | 48          | 10  | 12                | 113.7            | 84                           |
